# Supplementary material
Source: PubMed Central journal article supplement (PMC3186211)
Supplement: supp_111.040592_40592_Supplemental_Table_2.pdf [file supp_111.040592_40592_Supplemental_Table_2.pdf]

## ANALYSIS OF GLOBAL AND ADME GENE EXPRESSION IN THE PROGRESSIVE STAGES OF HUMAN NON-ALCOHOLIC FATTY LIVER DISEASE

April D. Lake, Petr Novak, Craig D. Fisher, Jonathan P. Jackson, Rhiannon N.

Hardwick, D. Dean Billheimer, Walter T. Klimecki, Nathan J. Cherrington

Drug Metabolism and Disposition

### Supplemental Data Table 2.

Drug Metabolizing Enzyme Differential Gene Expression.

Differentially Expressed Drug Metabolizing Enzymes (DMEs) in Human NAFLD.

(0 = No Change, 1 = Upregulation, -1 = Downregulation).

| DME      | ENTREZ ID | NORMAL-STEATOSIS | STEATOSIS-NASH | NORMAL-NASH |
|----------|-----------|------------------|----------------|-------------|
| SULT1C4  | 27233     | 0                | 1              | 1           |
| MTR      | 4548      | 0                | 1              | 1           |
| PAPSS2   | 9060      | 0                | -1             | -1          |
| CYP4F11  | 57834     | 0                | -1             | -1          |
| ALDH4A1  | 8659      | 0                | -1             | -1          |
| AOX1     | 316       | 0                | -1             | -1          |
| UGCG     | 7357      | 0                | 1              | 1           |
| CYP2E1   | 1571      | 0                | -1             | -1          |
| GPX2     | 2877      | 0                | -1             | -1          |
| HGSNAT   | 138050    | 0                | 1              | 1           |
| FMO2     | 2327      | 0                | 1              | 1           |
| NNMT     | 4837      | 0                | -1             | -1          |
| SULT1C2  | 6819      | 0                | 1              | 1           |
| HSD17B10 | 3028      | 0                | -1             | -1          |
| LOX      | 4015      | 0                | 1              | 1           |
| GGT5     | 2687      | 0                | 1              | 1           |
| GSTP1    | 2950      | 0                | 1              | 1           |
| PAPSS1   | 9061      | 0                | 1              | 1           |
| MTRR     | 4552      | 0                | -1             | -1          |
| CYP3A7   | 1551      | 0                | 1              | 1           |
| GCKR     | 2646      | 0                | -1             | -1          |
| CYP7B1   | 9420      | 0                | 1              | 1           |
| PTGS2    | 5743      | 0                | 1              | 1           |
| CYP21A2  | 1589      | 0                | -1             | -1          |
| CYP21A2  | 1589      | 0                | -1             | -1          |
| CYP21A2  | 1589      | 0                | -1             | -1          |
| HSD17B4  | 3295      | 0                | -1             | -1          |
| ALDH8A1  | 64577     | 0                | -1             | -1          |

|         |        |    |    |    |
|---------|--------|----|----|----|
| MAOA    | 4128   | 0  | -1 | -1 |
| GCLM    | 2730   | 1  | 0  | 1  |
| NAT12   | 122830 | 0  | -1 | -1 |
| HNMT    | 3176   | 0  | 0  | 1  |
| CYP51A1 | 1595   | 0  | 0  | -1 |
| UCHL3   | 7347   | 0  | -1 | -1 |
| UGT2B4  | 7363   | 0  | -1 | -1 |
| GPI     | 2821   | 1  | -1 | 0  |
| ALDH1A3 | 220    | 0  | 1  | 1  |
| CYB5R3  | 1727   | 0  | 0  | -1 |
| HSD3B2  | 3284   | 0  | 0  | -1 |
| BLVRA   | 644    | 0  | 1  | 1  |
| GZMA    | 3001   | 0  | 1  | 1  |
| UGT2B10 | 7365   | 0  | 1  | 1  |
| CES1    | 1066   | 0  | -1 | -1 |
| ALDH1A1 | 216    | 0  | 1  | 1  |
| AOC2    | 314    | 0  | 0  | -1 |
| TNRC6B  | 23112  | 0  | 0  | 1  |
| NAT2    | 10     | 0  | -1 | -1 |
| CYP2W1  | 54905  | 0  | 0  | -1 |
| CES4    | 51716  | 0  | -1 | -1 |
| GSTM2   | 2946   | 0  | 1  | 1  |
| MT2A    | 4502   | 0  | -1 | -1 |
| MT2A    | 4502   | 0  | -1 | -1 |
| PKM2    | 5315   | 0  | 0  | 1  |
| GPX1    | 2876   | 0  | 0  | -1 |
| ADSL    | 158    | 0  | -1 | 0  |
| CYP11A1 | 1583   | 0  | 1  | 0  |
| GSTM5   | 2949   | 0  | 1  | 0  |
| CEL     | 1056   | 0  | 0  | -1 |
| CYP26C1 | 340665 | -1 | 0  | -1 |
| PON3    | 5446   | 0  | 0  | -1 |
| NAT8    | 9027   | 0  | 1  | 1  |
| BAAT    | 570    | 0  | 0  | 1  |
| HYAL3   | 8372   | 0  | 0  | -1 |
| PON2    | 5445   | 0  | -1 | -1 |
| ADH6    | 130    | 0  | 0  | -1 |
| DHRS2   | 10202  | 0  | 0  | -1 |
| ALDH2   | 217    | 0  | -1 | -1 |
| AOC3    | 8639   | 0  | 0  | 0  |
| GNPNAT1 | 64841  | 0  | -1 | 0  |

|          |       |   |    |    |
|----------|-------|---|----|----|
| SRD5A2   | 6716  | 0 | -1 | 0  |
| CYP1B1   | 1545  | 0 | 0  | 1  |
| MAT2B    | 27430 | 0 | 0  | 1  |
| CYP27B1  | 1594  | 0 | 0  | -1 |
| DPYD     | 1806  | 0 | -1 | 0  |
| MAK10    | 60560 | 0 | 0  | 0  |
| UGT2B11  | 10720 | 0 | 1  | 0  |
| CYP2D7P1 | 1564  | 0 | 0  | -1 |
| BLVRB    | 645   | 0 | 0  | -1 |
| CYP1A2   | 1544  | 0 | 0  | -1 |
| NAT13    | 80218 | 0 | -1 | 0  |
| CYP26B1  | 56603 | 0 | 0  | -1 |
| CYP2D6   | 1565  | 0 | 0  | -1 |
| ALOX15   | 246   | 0 | 0  | -1 |
| GSTTP1   | 25774 | 0 | 0  | -1 |
| B3GAT1   | 27087 | 0 | 0  | -1 |
| FBP1     | 2203  | 0 | 1  | 0  |
| GSTTP1   | 25774 | 0 | 0  | -1 |
| GSTZ1    | 2954  | 0 | 0  | -1 |
| CYP27A1  | 1593  | 0 | 0  | -1 |
| GGT3P    | 2679  | 0 | 0  | -1 |
| NAT10    | 55226 | 0 | -1 | 0  |
| CYP2A6   | 1548  | 0 | 0  | 1  |
| NQO1     | 1728  | 0 | 0  | 1  |
| PNMT     | 5409  | 0 | 0  | -1 |
|          |       |   |    |    |
